# ON LAMINAR BOUNDARY-LAYER FLOW NEAR A POSITION OF SEPARATION

By S. GOLDSTEIN

(*Department of Mathematics, The University, Manchester*)

[Received 27 October 1947]

## SUMMARY

Singularities are considered in the solution of the laminar boundary-layer equations at a position of separation. A singularity of the type here considered occurred in a careful numerical computation by Hartree for a linearly decreasing velocity distribution outside the boundary layer; it may occur generally. Whenever it does occur, the boundary-layer equations cease to be valid at and near separation on the upstream side, and also downstream of separation. The work suggests that singularities may arise in the solution of non-linear parabolic equations due to their non-linearity. The formulae found may help computers of laminar boundary layers, who desire more than a rough solution, to have an end-point at which to aim.

## 1. Introduction and summary

FOR a flow at a large Reynolds number along an immersed solid surface a boundary layer is formed through which the velocity rises rapidly from zero at the surface to its value in the main stream. The approximate equations for the two-dimensional flow of a fluid of constant density  $\rho$  and kinematic viscosity  $\nu$  in a boundary layer are

$$\left. \begin{aligned} u \frac{\partial u}{\partial x} + v \frac{\partial u}{\partial y} &= -\frac{1}{\rho} \frac{\partial p}{\partial x} + \nu \frac{\partial^2 u}{\partial y^2} \\ u &= \frac{\partial \psi}{\partial y}, \quad v = -\frac{\partial \psi}{\partial x} \end{aligned} \right\}, \quad (1)$$

where  $x$  is distance measured along the solid boundary in the plane of the flow,  $y$  is distance normal to the surface,  $u$ ,  $v$  are the velocity components in the directions of  $x$  and  $y$  increasing,  $p$  the pressure, and  $\psi$  the stream function. According to the approximations of boundary-layer theory,  $p$  and  $\partial p/\partial x$  may be taken independent of  $y$ , and if  $U$  is the velocity just outside the boundary layer in the main stream,

$$-\frac{1}{\rho} \frac{\partial p}{\partial x} = U \frac{dU}{dx}. \quad (2)$$

Moreover, according to these approximations  $v/u$  and  $(\partial u/\partial x)/(\partial u/\partial y)$  are small.

As boundary conditions we have that  $u = 0$  and  $v = 0$  (or  $\psi = 0$ ) at  $y = 0$ ,  $u$  is given as a function of  $y$  for some initial value of  $x$ , and the

velocity passes over smoothly into the velocity of the main stream, i.e.  $u \rightarrow \bar{U}$ ,  $\partial u/\partial y \rightarrow 0$ ,  $\partial^2 u/\partial y^2 \rightarrow 0$ , etc., as  $y \rightarrow \infty$ .

If  $dU/dx < 0$  and  $\partial p/\partial x > 0$ , then  $\partial u/\partial y$  at the wall  $y = 0$  decreases as  $x$  increases until it vanishes; beyond the section at which it is zero, a slow back flow sets in along the wall, and the boundary layer separates from the surface.

Let  $d$  be any representative length of the system,  $U_0$  a representative velocity, such as the undisturbed stream velocity, and  $R$  the Reynolds number  $U_0 d/\nu$ . The equations may be made non-dimensional by writing

$$x' = x/d, \quad y' = R^{1/2}y/d, \quad u' = u/U_0, \quad v' = R^{1/2}v/U_0, \quad p' = p/\rho U_0^2. \quad (3)$$

In the non-dimensional form, let  $x' = 0$  be the initial section, at which  $u'$  is given as or approximated by a polynomial or power-series

$$u' = a_1 y' + a_2 y'^2 + \dots, \quad (4)$$

and let 
$$-\frac{\partial p'}{\partial x'} = p_0 + p_1 x' + p_2 x'^2 + \dots \quad (5)$$

Then it is known that if there is to be a solution without singularities, certain equations must be satisfied:

$$2a_2 + p_0 = 0, \quad a_3 = 0, \quad 5!a_5 + 2a_1 p_1 = 0, \quad 6!a_6 - 2p_0 p_1 = 0, \text{ etc.} \quad (6)$$

Only  $a_1, a_4, a_7, \dots$  are at our disposal. When the conditions are broken, the solution has an algebraic singularity at  $x = 0$  (1).†

At the position of separation  $\partial u/\partial y = 0$  at  $y = 0$ , i.e.  $a_1 = 0$ . The conditions for the absence of singularities when  $a_1 = 0$  are considerably more complicated than those above.‡ If we suppose  $u$  expanded in a power series in  $x$  (we drop the dashes for the present)

$$u = u_0 + u_1 x + u_2 x^2 + \dots, \quad (7)$$

where  $u_0, u_1, u_2$  are functions of  $y$ , expressible as power series,

$$\left. \begin{aligned} u_0 &= a_2 y^2 + a_3 y^3 + \dots \\ u_1 &= b_1 y + b_2 y^2 + \dots \\ u_2 &= c_1 y + c_2 y^2 + \dots \end{aligned} \right\}, \quad (8)$$

the conditions are

$$\left. \begin{aligned} 2a_2 + p_0 &= 0, \quad a_3 = 0, \quad a_4 = 0, \quad a_5 = 0, \quad 6!a_6 = 2p_0 p_1, \\ a_7 &= 0, \quad a_9 = 0, \text{ etc.} \end{aligned} \right\}. \quad (9)$$

Only  $a_8, a_{12}, a_{16}, a_{20}, \dots$  are at our disposal. In addition  $b_1, c_1, d_1, \dots$  are determined, not from the equations for  $u_1, u_2, u_3, \dots$  respectively, but from

† In the last term in equation (5) on p. 4 of ref. (1), the denominator should be  $8a_1^3$ , not  $4a_1^2$ ; I am indebted to Prof. Hartree for this correction. See also ref. (2) at end.

‡ Goldstein, loc. cit., pp. 17, 18. [In the last line of p. 17 of ref. (1), in the equations of the footnote, for  $6!a_6 = 2p_0 p_1$ , read  $6!a_6 = 2p_0 p_1$ .]

the conditions for the absence of singularities in  $u_2, u_3, u_4, \dots$  respectively. There is also an ambiguity of sign, which can be determined only from physical considerations. If the conditions are broken there is a formal solution for the flow downstream of the form

$$\left. \begin{aligned} \psi &= \xi^3[f_0(\eta) + \xi f_1(\eta) + \dots] \\ u &= \frac{1}{2}\xi^2[f'_0(\eta) + \xi f'_1(\eta) + \dots] \end{aligned} \right\} \quad (10)$$

where  $\xi = x^{\frac{1}{2}}, \quad \eta = y/4x^{\frac{1}{2}}. \quad (11)$

This formal solution fails, however, in certain circumstances, one of which is that the condition

$$2a_2 + p_0 = 0 \quad (12)$$

is satisfied, while the other conditions are not satisfied.

No other work has been reported on possible singularities at separation.

No analytical solution is known for a boundary-layer flow involving separation, and the methods used are approximate and numerical. The published methods of computation are rather rough, but recently more exact methods have been suggested and tried. The work described here arose out of an unpublished communication from Professor Hartree, in which he repeated Dr. Howarth's computation (3) for a linearly decreasing velocity distribution,  $U = \beta_0 - \beta_1 x$ , with  $u = U$  at  $x = 0$ . Professor Hartree replaces the partial derivatives with respect to  $x$  by finite differences, and retains the  $y$ -derivatives, so the partial differential equation is replaced approximately by a sequence of ordinary differential equations, each of which relates the velocity distribution through the boundary layer at one section to that at another section a short distance upstream, where it is known. The ordinary differential equations were solved laboriously on hand calculating machines rather than on the Differential Analyser in order that more significant figures might be retained.

Now all computations in which any attempt was made to obtain real accuracy at and near separation seem to have met with considerable difficulty. As a result of his computations, Professor Hartree was convinced that there was a singularity in the solution at the position of separation, and I undertook to try to find some formulae that would hold near this singularity and would help in finishing the computation.

To study the singularity near separation, the equations are put into non-dimensional form in a special way. Let  $x_s, U_s, U'_s$  be the values of  $x, U, dU/dx$  at separation, so that  $U_s > 0, U'_s < 0$ . We are not interested in any other properties or dimensions of the system, so as representative length  $l$  and Reynolds number  $R$  we take

$$l = -U_s/U'_s, \quad R = U_s l/\nu. \quad (13)$$

We are also concerned with the flow upstream of separation, so for our non-dimensional distances we write

$$x_1 = (x_s - x)/l, \quad y_1 = R^{\frac{1}{2}}y/l. \tag{14}$$

Also put

$$u_1 = u/U_s, \quad v_1 = R^{\frac{1}{2}}v/U_s, \quad U_1 = U/U_s, \quad p_1 = p/\rho U_s^2, \quad \psi_1 = R^{\frac{1}{2}}\psi/lU_s. \tag{15}$$

The equations become

$$\left. \begin{aligned} -u_1 \frac{\partial u_1}{\partial x_1} + v_1 \frac{\partial u_1}{\partial y_1} &= \frac{\partial p_1}{\partial x_1} + \frac{\partial^2 u_1}{\partial y_1^2} \\ u_1 &= \frac{\partial \psi_1}{\partial y_1}, \quad v_1 = \frac{\partial \psi_1}{\partial x_1} \\ \frac{\partial p_1}{\partial x_1} &= -U_1 \frac{dU_1}{dx_1} \end{aligned} \right\}. \tag{16}$$

It is easy to see that  $U_1 = 1$  and  $dU_1/dx_1 = 1$  at  $x_1 = 0$ , so we may write

$$\frac{\partial p_1}{\partial x_1} = -(1 + P_1 x_1 + P_2 x_1^2 + \dots), \tag{17}$$

i.e.  $p_0$  (in our previous notation) =  $-1$ . For the linear velocity distribution  $U = \beta_0 - \beta_1 x$ ,

$$\frac{\partial p_1}{\partial x_1} = -(1 + x_1), \quad P_1 = 1, \quad P_2 = P_3 = \dots = 0. \tag{18}$$

Formulae for the  $P_1, P_2, \dots$  are easily found in the general case, and if  $U$  is taken as a given function of  $x$ , it is easily found that the  $P$ 's are independent of the position of separation if

$$U = (\text{constant})e^{-\beta x}, \quad \text{or} \quad U = (\beta_0 - \beta_1 x)^m \quad \text{or} \quad (\beta_0 + \beta_1 x)^{-m}, \tag{19}$$

the constants  $\beta, \beta_0, \beta_1, m$  being positive. (However, since  $l = -U_s/U'_s$ , the scale varies as  $x_s$  varies in the last two cases.) For other values of  $U$ , the  $P$ 's depend on  $x_s$ , the position of separation.

The boundary conditions are  $\psi_1 = 0, u_1 = 0$  at  $y_1 = 0$ , and  $u_1 \rightarrow U_1$ , etc., as  $y_1 \rightarrow \infty$ . Since  $x_1 = 0$  is a position of separation,  $(\partial u_1/\partial y_1)_{y_1=0} = 0$  at  $x_1 = 0$ , so

$$u_1 = a_2 y_1^2 + a_3 y_1^3 + \dots \quad \text{at} \quad x_1 = 0. \tag{20}$$

Singularities in the solution for the corresponding system of equations for the motion downstream have been considered (see equations (10) and (11)); near  $x_1 = 0, y_1 = 0, \psi_1$  is a function of  $x_1^{\frac{1}{2}}$  and  $y_1/x_1^{\frac{1}{2}}$ . The skin-friction is  $\mu(\partial u/\partial y)_{y=0}$  and the determining quantity is  $(\partial u_1/\partial y_1)_{y_1=0}$ , which is an ascending series of powers of  $x_1^{\frac{1}{2}}$ , beginning with a multiple of  $x_1^{\frac{1}{2}}$ . If, however,  $2a_2 + p_0 = 0$ , which corresponds to  $a_2 = \frac{1}{2}$  in the new notation, there are special features in the solution; in particular the series for  $(\partial u_1/\partial y_1)_{y_1=0}$  now begins with a term in  $x_1^{\frac{1}{2}}$ . Now Professor Hartree was

quite certain that this particular feature was present in his computed solution. The calculations reported here therefore rest on three assumptions, all of which were satisfied in Hartree's numerical solution: (i) there is a singularity at separation; (ii) there is a finite value of  $u_1$  at separation for  $y_1 \neq 0$ ; (iii)  $a_2 = \frac{1}{2}$ . Related to (iii) Professor Hartree found (empirically) that in his solution  $(\partial u_1 / \partial y_1)_{y_1=0}$  behaved near  $x_1 = 0$  like a multiple of  $x_1^r$ , where  $r$  is certainly less than 1 and greater than  $\frac{1}{2}$ . Thus, we must take

$$u_1 = \frac{1}{2}y^2 + a_3 y^3 + \dots \quad \text{at } x_1 = 0, \tag{21}$$

and as a result we find that

$$(\partial u_1 / \partial y_1)_{y_1=0} = 2^{\frac{1}{2}}(\alpha_1 x_1^{\frac{1}{2}} + \alpha_2 x_1^{\frac{3}{2}} + \alpha_3 x_1 + \alpha_4 x_1^{\frac{5}{2}} + \dots), \tag{22}$$

where the  $\alpha$ 's are constants. (The factor  $2^{\frac{1}{2}}$  is inserted to conform to the notation in § 2.)

The first purpose of the calculations was to find the connexions between  $a_3, a_4, a_5, a_6, \dots$  and  $\alpha_1, \alpha_2, \alpha_3, \dots$  and other formulae for  $u$  at and near  $x_1 = 0$  to see if the results fitted the numerical values for the special solution. There is no mathematical proof that a solution exists with singularities of the type considered near separation, but with the above assumptions it is difficult to see how the solution could be of a different type.

We may remark that in assuming that  $a_2 = \frac{1}{2}$ , we are in effect assuming that  $(\partial^2 u_1 / \partial y_1^2)_{y_1=0}$  is continuous at  $x_1 = 0$ , and then  $(\partial^n u_1 / \partial y_1^n)_{y_1=0}$  is found to be continuous at  $x_1 = 0$  for  $n = 1, 2, 3, 4$  and discontinuous for  $n = 5$  and 6 and probably for all  $n \geq 5$ , though  $\partial^n u_1 / \partial y_1^n$  is continuous for  $y_1 \neq 0$ . More important, it is found that at separation  $v_1$  and  $\partial u_1 / \partial x_1$  become infinite in such a way that  $x_1^{\frac{1}{2}} v_1$  and  $x_1^{\frac{1}{2}} \partial u_1 / \partial x_1$  have finite non-zero limits as  $x_1 \rightarrow 0$  for all non-zero  $y_1$ . The basic assumptions of boundary-layer theory therefore do not hold at and near separation. Nevertheless, large cross-velocities are to be expected at separation, otherwise the assumptions of boundary-layer theory would not break down.

The formal solution for the motion upstream is found by writing

$$\xi = x_1^{\frac{1}{2}}, \quad \eta = y_1 / 2^{\frac{1}{2}} x_1^{\frac{1}{2}}, \tag{23}$$

$$\psi_1 = 2^{\frac{1}{2}} \xi^2 [f_0(\eta) + \xi f_1(\eta) + \xi^2 f_2(\eta) + \dots], \tag{24}$$

$$u_1 = 2 \xi^2 [f_0'(\eta) + \xi f_1'(\eta) + \xi^2 f_2'(\eta) + \dots] \tag{25}$$

in (16), and equating powers of  $\xi$ . Since  $\psi_1 = 0$  and  $u_1 = 0$  at  $y_1 = 0$ ,  $f_r(0) = f_r'(0) = 0$ , and from the value (21) of  $u_1$  at  $x_1 = 0$  we find the condition

$$\lim_{\eta \rightarrow \infty} \frac{f_r'}{\eta^{r+2}} = 2^{\frac{1}{2}} a_{r+2} \quad (r = 0, 1, 2, \dots). \tag{26}$$

The solution for  $f_r$  must have a double zero at the origin, and must not involve exponentially large terms as  $\eta \rightarrow \infty$ .

The condition  $u_1 \rightarrow U_1$  as  $y_1 \rightarrow \infty$  is satisfied for  $x_1 > 0$  if it is satisfied at  $x_1 = 0$ , i.e. if  $u_1 \rightarrow 1$  as  $y_1 \rightarrow \infty$  at  $x_1 = 0$ .

With  $a_2 = \frac{1}{2}$ , the solution for  $f_0$  is found to be  $f_0 = \eta^3/6$ . The solution for  $f_1$  is  $f_1 = \alpha_1 \eta^2$ , and

$$a_3 = \frac{1}{\sqrt{2}} \lim_{\eta \rightarrow 0} \frac{f_1'}{\eta^3} = 0. \quad (27)$$

Then 
$$f_2 = \alpha_2 \eta^2 - \frac{\alpha_1^2}{15} \eta^5, \quad (28)$$

and 
$$a_4 = -\frac{1}{6} \alpha_1^2. \quad (29)$$

[The  $a$ 's and  $\alpha$ 's are as in (21) and (22).] The equation for  $f_3$  becomes

$$f_3''' - \frac{1}{2} \eta^3 f_3'' + \frac{7}{2} \eta^2 f_3' - 6 \eta f_3 = 5 f_1'' f_2 - 7 f_1' f_2 + 4 f_1 f_2''. \quad (30)$$

The equations for all succeeding  $f$ 's are non-homogeneous linear equations, with the right-hand side rapidly becoming more and more complicated; thus for  $f_4$  it involves  $f_1, f_2, f_3, P_1$ , for  $f_5$  the first four  $f$ 's, and so on. The complementary functions involve integrals of confluent hypergeometric functions; the particular integrals are very involved. The condition for the absence of exponentially large terms in  $f_3$  is†

$$\alpha_2 = \frac{2^{\frac{1}{2}} \pi^{\frac{1}{2}}}{5(\frac{1}{4}!)^3} \alpha_1^2, \quad (31)$$

and then from (26) 
$$a_5 = -\frac{2^{\frac{1}{2}} \pi}{40(\frac{1}{4}!)^2} \alpha_1^3. \quad (32)$$

The condition for the absence of exponentially large terms in  $f_4$  is

$$\alpha_3 = \frac{\pi^3}{400(\frac{1}{4}!)^6} (35 - 8\sqrt{2}) \alpha_1^3, \quad (33)$$

and from (26) 
$$a_6 = \left( \frac{1}{9} - \frac{7\pi^2}{600(\frac{1}{4}!)^4} \right) \alpha_1^4 - \frac{P_1}{360}. \quad (34)$$

The condition for the absence of exponentially large terms in  $f_5$  gives  $\alpha_4$  as a multiple of  $\alpha_1^4$ , though the constant must be found numerically, and then  $a_7$  is found; but the condition for the absence of exponentially large terms in  $f_6$  does *not* give  $\alpha_5$ ; it requires that

$$\int_0^{\infty} H_6 \left( \eta^2 - \frac{\eta^6}{5} + \frac{\eta^{10}}{180} \right) \exp \left( -\frac{\eta^4}{8} \right) d\eta = 0, \quad (35)$$

where  $H_6$  is a complicated function of  $\eta$ , involving  $f_5$ .

Again,  $\alpha_6$  is determined from  $f_7$  in terms of  $\alpha_1, \alpha_5$ , and  $P_1$ ,  $\alpha_7$  from  $f_8$  in terms of  $\alpha_1, \alpha_5$ , and  $P_1$ , and so on until we come to  $f_{10}$ . It is possible, though it has not been proved, that  $\alpha_5$  is determined from  $f_{10}$ ,  $\alpha_9$  from  $f_{14}$ ,

†  $x!$  is written for  $\Gamma(x+1)$ .

and so on. If so, then only  $\alpha_1$  remains to be determined, and  $a_4$  (and therefore  $\alpha_1$ ) is probably determined by the condition  $u_1 \rightarrow 1$  as  $y_1 \rightarrow \infty$  at  $x_1 = 0$ . If so the whole solution is determined at separation. In fact, if it is true that all the other constants are determinate in terms of  $a_4$  and the  $P$ 's, there is a solution only if it is possible to choose  $a_4$  so that the condition  $u_1 \rightarrow 1$  as  $y_1 \rightarrow \infty$  at  $x_1 = 0$  is satisfied. Unless this condition is satisfied for every value of  $a_4$ , it will presumably fix  $a_4$  in terms of the  $P$ 's. If  $a_4$  is so fixed, the non-dimensional velocity distribution at separation,  $x_1 = 0$ , and just upstream of separation, for small positive values of  $x_1$ , is fixed in terms of the  $P$ 's. Suppose now we have a problem in which  $U$  is a given decreasing function of  $x$ , and  $u$  a given function of  $y$  for some  $x < x_s$ . There are some  $U$ 's for which the  $P$ 's are independent of  $x_s$ ; otherwise they vary with  $x_s$ . When separation takes place, the non-dimensional velocity distribution at and near separation is independent of the initial distribution of  $u$  for the former values of  $U$ , and for the others it is the same for all initial distributions of  $u$  for which separation takes place at the same value of  $x$ . This suggests that what has been found is an *asymptotic* solution at and near separation, and that the full non-dimensional solutions in the above cases all behave asymptotically in the same way near separation.

It appears that the singularity at separation is due to the non-linear character of the equations. It is possible to simulate the phenomenon of separation by a linear system of equations, and there is then no singularity at separation. For example, the solution of

$$\frac{\partial u}{\partial t} = -1 + \frac{\partial^2 u}{\partial y^2}, \quad u = 1 \text{ at } t = 0, \quad u = 0 \text{ at } y = 0, \quad u \text{ finite as } y \rightarrow \infty, \tag{36}$$

is 
$$u = \frac{1}{2}y^2 + (1-t - \frac{1}{2}y^2)\text{erf} \frac{y}{2\sqrt{t}} - y \sqrt{\frac{t}{\pi}} \exp\left(-\frac{y^2}{4t}\right), \tag{37}$$

where 
$$\text{erf } x = \frac{2}{\sqrt{\pi}} \int_0^x e^{-w^2} dw, \tag{38}$$

so 
$$(\partial u / \partial y)_{y=0} = 0 \quad \text{at} \quad t = \frac{1}{2}. \tag{39}$$

We should remark also that in equations that are linear but are otherwise similar to the equations here considered (the equation for the temperature in the theory of the conduction of heat,† for example), if we attempt to work backwards (i.e. to solve for negative time) from a

† The relationship of the boundary-layer equations to the equation of heat conduction has been stressed by Prandtl (2) (loc. cit., pp. 79, 80) in connexion with difficulties to be expected when  $u \leq 0$ .

singularity we encounter exponentially large terms. With given initial and boundary conditions, however, the solution for such a linear equation is free from singularities for positive non-zero time, whereas the basis of the present discussion is the assumption that singularities may occur at separation in the solution of the non-linear equations considered.

The special case considered by Professor Hartree is one in which by a correct choice of scale the  $P$ 's may be made independent of  $x_s$ . There is always the possibility, therefore, that the occurrence of a singularity at separation is restricted to such cases. Another possibility is that a singularity will always occur except for certain special pressure variations in the neighbourhood of separation, and that, experimentally, whatever we may do, the pressure variations near separation will always be such that no singularity will occur.

It is a necessary consequence of the discussion of the motion upstream of separation that  $a_4$  is negative or zero. Professor Hartree finds a negative  $a_4$  from his special numerical solution. When we consider the motion *downstream* of separation in a similar way, we find that when  $a_4$  is negative the solution downstream is not *real*. When there is a singularity at separation there is no real solution at all farther downstream. When  $a_4 = 0$  there is a solution downstream, but then we have a case in which the whole solution is free from singularities. These cases include that in which  $(\partial u / \partial y)_{y=0} = 0$  for all  $x$ . There must, of course, be restrictions on the pressure distributions in order that this should happen, and these conditions arise from the condition that  $u_1 \rightarrow 1$  as  $y_1 \rightarrow \infty$  at  $x_1 = 0$ . This our method does not permit us to discuss, but one solution (due to Falkner and Skan, 4†) is known in which  $U = cx^m$ ,  $m = -0.0904$  approximately.

As far as numerical values are concerned, and comparison with the computed values, Professor Hartree fitted his solution to the formulae here obtained, and considered that he had obtained a reasonable fit. The matter has been recently reconsidered by Mr. C. W. Jones, who has tabulated  $f_3, f_4, f_5$  and has found that within the accuracy of his computation, the integral condition (35) for the absence of exponentially large terms in  $f_6$  is satisfied.

Mr. Jones has compared the skin-friction, the velocity distributions at separation not far from the wall, the transition to main-stream conditions at separation, and the velocity distribution just downstream of separation (at  $(8\beta_1/\beta_0)x = 0.956$ , where  $U = \beta_0 - \beta_1 x$  and  $(8\beta_1/\beta_0)x_s = 0.959$ ). A satisfactory fit is obtained with  $\alpha_1$  about 0.47 or 0.48. A satisfactory transition to main-stream conditions seems to be obtained, but it is not sensitive to changes in  $\alpha_1$ .

† See also (5).



If we assume that Mr. Jones's numerical work is sufficient to answer certain questions, and to make it plausible that our formulae fit the solution in the case considered, we still do not know for certain that  $\alpha_5, \alpha_9, \dots$  are determined from the equations for  $f_9, f_{13}, \dots$ , and, if they are, that  $a_4$  (and therefore  $\alpha_1$ ) can be determined from the condition  $u_1 \rightarrow 1$  as  $y_1 \rightarrow \infty$  at  $x_1 = 0$ . It is clear that an adequate discussion is not possible by the method used here. Three more important questions also remain:

- (1) Is it correct that the formulae represent an asymptotic solution at and near separation?
- (2) What are the most general restrictions on the pressure distribution in order that solutions should exist for which  $(\partial u / \partial y)_{y=0} = 0$  for all  $x$ ?
- (3) A singularity when  $U = \beta_0 - \beta_1 x$  being assumed, is the occurrence of a singularity restricted to cases in which the  $P$ 's are independent of  $x_s$ ? Or does a singularity always occur unless  $(\partial u / \partial y)_{y=0} = 0$  for all  $x$ ? Or does a singularity always occur except for certain special pressure distributions near separation, and are experimental pressure distributions always of the special type?

It should be remarked that although there is a certain physical plausibility in the notion that large cross-velocities should occur at separation, the existing experimental information is insufficient to settle the question.

The work described may be summed up by saying that it throws doubt on the validity of the boundary-layer equations at and near separation on the upstream side, and also downstream of separation; inferences from these equations in these regions, which are fairly common in the literature, are therefore also in doubt; mathematically the work suggests that singularities may arise in the solution of non-linear parabolic equations, due to their non-linearity; and formulae have been found which may help computers of laminar boundary layers, who desire more than a rough solution, to have an end-point at which to aim.

## 2. The solution upstream

Substitute (23), (24), and (17) into (16), and equate coefficients of powers of  $\xi$ . The equation for  $f_0$ , obtained from the coefficient of  $\xi^0$ , is

$$f_0''' - 3f_0 f_0'' + 2f_0'^2 = 1. \tag{40}$$

Since  $\psi_1 = 0$  and  $u_1 = 0$  at  $y_1 = 0$ ,

$$f_r(0) = f_r'(0) = 0 \quad (r = 0, 1, 2, \dots). \tag{41}$$

When  $\xi \rightarrow 0$ ,  $\eta \rightarrow \infty$  if  $y_1 \neq 0$ , and since  $2^{1/2} \xi \eta = y_1$ ,  $\lim_{\xi \rightarrow 0} u_1$  is given by (21) if

$$\lim_{\eta \rightarrow \infty} \frac{f_r'}{\eta^{r+2}} = 2^{1/2} a_{r+2} \quad (r = 0, 1, 2, \dots). \tag{42}$$

The condition that the velocity should pass over smoothly into the velocity of the main stream will be considered in § 3, when the solution for large values of  $y_1/x_1^{\frac{1}{2}}$  is considered.

Since  $a_2 = \frac{1}{2}$ , the solution for  $f_0$  is

$$f_0 = \eta^3/6. \tag{43}$$

The equation for  $f_r$  is then found to be

$$f_r''' - \frac{1}{2}\eta^3 f_r'' + \frac{1}{2}(r+4)\eta^2 f_r' - (r+3)\eta f_r = G_r, \tag{44}$$

where

$$G_1 = 0, \quad G_2 = 4f_1 f_1'' - 3f_1'^2, \tag{45}$$

and for  $r \geq 2$ ,

$$G_r = \sum_{s=1}^{r-1} [(r-s+3)f_s'' f_{r-s}' - (r-s+2)f_s' f_{r-s}''] + P_{r/4}, \tag{46}$$

$P_{r/4}$  being put equal to zero except when  $\frac{1}{4}r$  is integral. The solution for  $f_1$  with a double zero at the origin is

$$f_1 = \alpha_1 \eta^2, \tag{47}$$

where  $\alpha_1$  is a constant; hence from (42),

$$a_3 = \frac{1}{\sqrt{2}} \lim_{\eta \rightarrow \infty} \frac{f_1'}{\eta^3} = 0. \tag{48}$$

The solution for  $f_2$  with a double zero at the origin is now found to be

$$f_2 = \alpha_2 \eta^2 - \frac{\alpha_1^2}{15} \eta^5, \tag{49}$$

where  $\alpha_2$  is a constant; hence from (42)

$$a_4 = -\frac{1}{3} \alpha_1^2. \tag{50}$$

In order to write down the general solution for  $f_3$  with a double zero at the origin, and to consider its behaviour as  $\eta \rightarrow \infty$ , some discussion is necessary of the complementary functions, and it is advisable to break off and discuss generally the complementary functions of the equation for  $f_r$ .

Three independent complementary functions are  $\eta^2$ ,  $g_r$ , and  $h_r$ , where, if the function  ${}_1F_1(a, b, x)$  is defined by

$${}_1F_1(a, b, x) = 1 + \frac{a}{1 \cdot b} x + \frac{a(a+1)}{2! b(b+1)} x^2 + \frac{a(a+1)(a+2)}{3! b(b+1)(b+2)} x^3 + \dots, \tag{51}$$

then†

$$\begin{aligned} g_r &= - \sum_{m=0}^{\infty} \frac{(m - \frac{3}{2} - \frac{1}{4}r)! \frac{1}{4}! \eta^{4m+1}}{m! (-\frac{3}{2} - \frac{1}{4}r)! (m + \frac{1}{4})! 8^m (4m-1)} \\ &= \eta^{-r} \eta^2 \int_0^{\eta} \eta^{-2} \{ {}_1F_1(-\frac{1}{2} - \frac{1}{4}r, \frac{1}{4}, \eta^4/8) - 1 \} d\eta, \end{aligned} \tag{52}$$

†  $x!$  is written for  $\Gamma(x+1)$ , as before.

and 
$$h_r = - \sum_{m=0}^{\infty} \frac{(m-\frac{7}{4}-\frac{1}{4}r)! (-\frac{1}{4})! \eta^{4m}}{m! (-\frac{7}{4}-\frac{1}{4}r)! (m-\frac{1}{4})! 8^m (2m-1)}$$

$$= 1 - 2\eta^2 \int_0^{\eta} \eta^{-3} \{ {}_1F_1(-\frac{3}{4}-\frac{1}{4}r, \frac{3}{4}, \eta^4/8 - 1; d\eta. \tag{53}$$

The series for  $g_r$  terminates when  $r = 4m + 2$ , and that for  $h_r$  terminates when  $r = 4m + 1$ ,  $m$  being a positive integer or zero.

As regards asymptotic expansions, in addition to the solution  $\eta^2$  the equation (44) with  $G_r$  put equal to zero has two solutions whose asymptotic expansions for large  $\eta$  commence with multiples of

$$\eta^{r+3} \text{ and of } \eta^{-(r+10)} \exp(\eta^4/8)$$

respectively.

When  $x$  is large and positive (6), †

$${}_1F_1(a, b, x) \sim \frac{(b-1)!}{(a-1)!} e^x x^{a-b} \times$$

$$\times \left\{ 1 + \frac{(b-a)(1-a)}{x} + \frac{(b-a)(b-a+1)(1-a)(2-a)}{2! x^2} + \dots \right\} \tag{54}$$

so

$${}_1F_1(-\frac{1}{2}-\frac{1}{4}r, \frac{5}{4}, \eta^4/8) \sim \frac{2^{(3r+13)/4} (-\frac{3}{4})!}{(-\frac{3}{2}-\frac{1}{4}r)!} \exp(\eta^4/8) \eta^{-(r+7)} \{1 + \dots\} \quad (r \neq 4m+2) \tag{55}$$

and

$${}_1F_1(-\frac{3}{4}-\frac{1}{4}r, \frac{3}{4}, \eta^4/8) \sim - \frac{2^{(3r+10)/4} (-\frac{5}{4})!}{(-\frac{7}{4}-\frac{1}{4}r)!} \exp(\eta^4/8) \eta^{-(r+6)} \{1 + \dots\} \quad (r \neq 4m+1). \tag{56}$$

Hence

$$g_r \sim - \frac{2^{(3r+17)/4} (-\frac{3}{4})!}{(-\frac{3}{2}-\frac{1}{4}r)!} \exp(\eta^4/8) \eta^{-(r+10)} \{1 + \dots\} \quad (r \neq 4m+2) \tag{57}$$

and 
$$h_r \sim \frac{2^{(3r+13)/4} (-\frac{5}{4})!}{(-\frac{7}{4}-\frac{1}{4}r)!} \exp(\eta^4/8) \eta^{-(r+10)} \{1 + \dots\} \quad (r \neq 4m+1). \tag{58}$$

Exponentially large terms must not occur in the solution for  $f_r$ , so when  $r \neq 4m + 1$  or  $4m + 2$ ,  $g_r$  and  $h_r$  must occur in the combination

$$(-\frac{5}{4})! (-\frac{3}{2}-\frac{1}{4}r)! g_r + 2^{-1} (-\frac{3}{4})! (-\frac{7}{4}-\frac{1}{4}r)! h_r. \tag{59}$$

But ‡

$$(a-1)! (-b)! {}_1F_1(a, b, x) + (a-b)! (b-2)! x^{1-b} {}_1F_1(a+1-b, 2-b, x)$$

$$\sim (a-1)! (a-b)! x^{-a} \left\{ 1 - \frac{a(a+1-b)}{x} + \frac{a(a+1)(a+1-b)(a+2-b)}{2! x^2} - \dots \right\}; \tag{60}$$

† The formula is on p. 258 of ref. (6).

‡ Barnes (5), op. cit., p. 259.

hence

$$\begin{aligned} & (-\frac{5}{4})! (-\frac{3}{2} - \frac{1}{4}r)! {}_1F_1(-\frac{1}{2} - \frac{1}{4}r, \frac{5}{4}, \eta^4/8) + \\ & + 8^{\frac{1}{2}} (-\frac{3}{4})! (-\frac{7}{4} - \frac{1}{4}r)! \eta^{-1} {}_1F_1(-\frac{3}{4} - \frac{1}{4}r, \frac{3}{4}, \eta^4/8) \\ & \sim 8^{-(r+2)/4} (-\frac{3}{2} - \frac{1}{4}r)! (-\frac{7}{4} - \frac{1}{4}r)! \eta^{r+2} \left\{ 1 - \frac{(2+r)(3+r)}{2\eta^4} + \right. \\ & \left. + \frac{(2+r)(2-r)(3+r)(1-r)}{2 \cdot 4 \cdot \eta^8} - \frac{(2+r)(2-r)(6-r)(3+r)(1-r)(5-r)}{2 \cdot 4 \cdot 6 \cdot \eta^{12}} + \dots \right\} \\ & (r \neq 4m+1 \text{ or } 4m+2) \quad (61) \end{aligned}$$

and

$$\begin{aligned} & (-\frac{5}{4})! (-\frac{3}{2} - \frac{1}{4}r)! g_r + 2^{-\frac{1}{2}} (-\frac{3}{4})! (-\frac{7}{4} - \frac{1}{4}r)! h_r \\ & = (-\frac{5}{4})! (-\frac{3}{2} - \frac{1}{4}r)! \eta + 2^{-\frac{1}{2}} (-\frac{3}{4})! (-\frac{7}{4} - \frac{1}{4}r)! - \\ & - \eta^2 \int_0^\eta \eta^{-2} \{ (-\frac{5}{4})! (-\frac{3}{2} - \frac{1}{4}r)! [{}_1F_1(-\frac{1}{2} - \frac{1}{4}r, \frac{5}{4}, \eta^4/8) - 1] + \\ & + 8^{\frac{1}{2}} (-\frac{3}{4})! (-\frac{7}{4} - \frac{1}{4}r)! \eta^{-1} [{}_1F_1(-\frac{3}{4} - \frac{1}{4}r, \frac{3}{4}, \eta^4/8) - 1] \} d\eta \\ & \sim -8^{-(r+2)/4} (-\frac{3}{2} - \frac{1}{4}r)! (-\frac{7}{4} - \frac{1}{4}r)! \left\{ \frac{\eta^{r+3}}{r+1} - \frac{(2+r)(3+r)\eta^{r-1}}{2(r-3)} + \right. \\ & \left. + \frac{(2+r)(2-r)(3+r)(1-r)\eta^{r-5}}{2 \cdot 4 \cdot (r-7)} - \right. \\ & \left. - \frac{(2+r)(2-r)(6-r)(3+r)(1-r)(5-r)\eta^{r-9}}{2 \cdot 4 \cdot 6 \cdot (r-11)} + \dots \right\} + \\ & + \text{constant} \cdot \eta^2 \quad (r = 4m). \quad (62) \end{aligned}$$

When  $r = 4m+3$  the term with a zero denominator must be replaced by

$$\begin{aligned} & (-1)^m 8^{-m-5/4} (-m - \frac{9}{4})! (-m - \frac{5}{2})! \times \\ & \times \frac{5 \cdot 9 \cdot 13 \dots (4m+5) \cdot 3 \cdot 5 \cdot 7 \dots (2m+3)}{(m+1)!} \eta^2 \log \eta, \end{aligned}$$

which reduces to 
$$\frac{(-1)^{m+1} \cdot 2^{\frac{1}{2}} \cdot \pi^{\frac{1}{2}} \cdot (-\frac{5}{4})!}{(m+1)!} \eta^2 \log \eta. \quad (63)$$

(62) may be verified and the constant multiplier of  $\eta^2$  found by considering

$$\frac{1}{2\pi i} \int (-s-1)! (-\frac{5}{4}-s)! (s-\frac{3}{2}-\frac{1}{4}r)! \frac{\eta^{4s+1}}{8^s(4s-1)} \quad (64)$$

taken round a contour consisting of the straight line from  $-N-\frac{1}{2}-\infty i$  to  $-N-\frac{1}{2}+\infty i$  and the part of a circle of infinite radius to the right of the line. When  $r \neq 4m+3$  the constant multiple of  $\eta^2$  in (62) is found to be

$$2^{-7/4} \pi^{\frac{1}{2}} (-\frac{5}{4})! (-\frac{3}{4}-\frac{1}{4}r)! \eta^2. \quad (65)$$

When  $r = 4m + 3$  the term with a zero denominator in (62) must be omitted, and (65) replaced by

$$\frac{(-1)^{m+1} \pi^{\frac{1}{2}} (-\frac{5}{4})!}{2^{7/4} (m+1)!} \eta^2 \left[ \log \frac{\eta^4}{8} - \mathfrak{F}(-\frac{5}{4}) - \mathfrak{F}(-\frac{3}{2}) + \mathfrak{F}(m+1) \right], \tag{66}$$

where 
$$\mathfrak{F}(z) = \frac{d}{dz} \log z!.$$
 \tag{67}

The multiplier of  $\eta^2 \log \eta$  agrees with that in (63). If  $\gamma$  is Euler's constant (equal to 0.5772...)

$$\left. \begin{aligned} \mathfrak{F}(m+1) &= 1 + \frac{1}{2} + \frac{1}{3} + \dots + \frac{1}{m+1} - \gamma, \\ \mathfrak{F}(-\frac{5}{4}) &= \frac{1}{2} \pi + 4 - 3 \log 2 - \gamma, \\ \mathfrak{F}(-\frac{3}{2}) &= 2 - 2 \log 2 - \gamma, \end{aligned} \right\} \tag{68}$$

so (66) is equal to

$$\frac{(-1)^{m+1} \pi^{\frac{1}{2}} (-\frac{5}{4})!}{2^{7/4} (m+1)!} \eta^2 \left[ 4 \log \eta + \frac{1}{2} + \frac{1}{3} + \dots + \frac{1}{m+1} + 2 \log 2 + \gamma - \frac{1}{2} \pi - 5 \right]. \tag{69}$$

In particular, since

$$(-\frac{5}{4})! = -\frac{2^{\frac{1}{2}} \cdot \pi}{4!}, \quad (-\frac{3}{2})! = \frac{4\pi^{\frac{1}{2}}}{3}, \quad (-\frac{1}{4})! = \frac{4 \cdot 2^{\frac{1}{2}} \cdot \pi}{5 \cdot 4!}, \quad (-\frac{1}{4})! = \frac{64 \cdot \frac{1}{4}!}{21}, \tag{70}$$

it follows from (62), (65), and (69) that

$$\begin{aligned} h_3 - \frac{3 \cdot 2^{\frac{1}{2}} \cdot \pi^{\frac{1}{2}}}{10 \cdot (\frac{1}{4}!)^3} g_3 &\sim -\frac{\pi}{160 (\frac{1}{4}!)^2} \left\{ \eta^6 - \frac{15}{2!} \frac{1}{\eta^2} + \frac{15 \cdot 1 \cdot 3}{2 \cdot 3!} \frac{1}{\eta^6} - \right. \\ &\quad \left. - \frac{15 \cdot 1 \cdot 3 \cdot 3 \cdot 7}{3 \cdot 4!} \frac{1}{\eta^{10}} + \dots \right\} + \frac{3\pi}{32 (\frac{1}{4}!)^2} \eta^2 [4 \log \eta + 2 \log 2 + \gamma - \frac{1}{2} \pi - 5] \end{aligned} \tag{71}$$

and

$$\begin{aligned} h_4 - \frac{7 \cdot 2^{\frac{1}{2}} \cdot \pi^{\frac{1}{2}}}{64 (\frac{1}{4}!)^3} g_4 &\sim -\frac{\pi^{\frac{1}{2}}}{48 \cdot 2^{\frac{1}{2}} \cdot \frac{1}{4}!} \left\{ \frac{\eta^7}{5} - \frac{3 \cdot 7}{1!} \eta^3 - \frac{3 \cdot 1 \cdot 7 \cdot 3}{3 \cdot 2!} \frac{1}{\eta} + \right. \\ &\quad + \frac{3 \cdot 1 \cdot 1 \cdot 7 \cdot 3 \cdot 1}{7 \cdot 3!} \frac{1}{\eta^5} - \frac{3 \cdot 1 \cdot 1 \cdot 3 \cdot 7 \cdot 3 \cdot 1 \cdot 5}{11 \cdot 4!} \frac{1}{\eta^9} + \\ &\quad \left. + \frac{3 \cdot 1 \cdot 1 \cdot 3 \cdot 5 \cdot 7 \cdot 3 \cdot 1 \cdot 5 \cdot 9}{15 \cdot 5!} \frac{1}{\eta^{13}} - \dots \right\} - \frac{21 \cdot 2^{\frac{1}{2}} \cdot \pi^{\frac{1}{2}}}{640 (\frac{1}{4}!)^4} \eta^2. \end{aligned} \tag{72}$$

We now return to the equation for  $f_3$ , which is

$$f_3''' - \frac{1}{2} \eta^3 f_3'' + \frac{1}{2} \eta^2 f_3' - 6 \eta f_3 = -10 \alpha_1 \alpha_2 \eta^2 - \frac{4}{3} \alpha_1^3 \eta^5. \tag{73}$$

The general integral with a double zero at the origin is

$$f_3 = \alpha_3 \eta^2 + 4 \alpha_1 \alpha_2 (\eta - g_3) - \frac{8}{3} \alpha_1^3 (1 + \frac{1}{4} \eta^4 - h_3), \tag{74}$$

where  $\alpha_3$  is a constant. In order that exponentially large terms should

not occur in  $f_3$ ,  $g_3$  and  $h_3$  must appear in (74) in the same combination as in (71). Hence we must have

$$\alpha_2 = \frac{2^{\frac{1}{2}} \cdot \pi^{\frac{1}{2}}}{5(\frac{1}{4}!)^3} \alpha_1^2 \tag{75}$$

and

$$\begin{aligned} f_3 &= \alpha_3 \eta^2 - \frac{8}{3} \alpha_1^3 \left( 1 + \frac{1}{4} \eta^4 - h_3 - \frac{3 \cdot 2^{\frac{1}{2}} \cdot \pi^{\frac{1}{2}}}{10(\frac{1}{4}!)^3} (\eta - g_3) \right) \\ &= \alpha_3 \eta^2 - \frac{8}{3} \alpha_1^3 \left\{ \sum_{m=2}^{\infty} \frac{(m - \frac{5}{2})! (-\frac{1}{4}!) \eta^{4m}}{m! (-\frac{5}{2})! (m - \frac{1}{4})! 8^m (2m - 1)} \right. \\ &\quad \left. - \frac{3 \cdot 2^{\frac{1}{2}} \cdot \pi^{\frac{1}{2}}}{10(\frac{1}{4}!)^3} \sum_{m=1}^{\infty} \frac{(m - \frac{9}{4})! \frac{1}{4}! \eta^{4m+1}}{m! (-\frac{9}{4})! (m + \frac{1}{4})! 8^m (4m - 1)} \right\}. \tag{76} \end{aligned}$$

For large values of  $\eta$ ,

$$\begin{aligned} f_3 \sim & -\frac{\pi}{60(\frac{1}{4}!)^2} \alpha_1^3 \left( \eta^6 - \frac{15}{2!} \frac{1}{\eta^2} + \frac{15 \cdot 1 \cdot 3}{2 \cdot 3!} \frac{1}{\eta^6} - \frac{15 \cdot 1 \cdot 3 \cdot 3 \cdot 7}{3 \cdot 4!} \frac{1}{\eta^{10}} + \dots \right) + \\ & + \frac{\pi}{4(\frac{1}{4}!)^2} \alpha_1^3 \eta^2 [4 \log \eta + 2 \log 2 + \gamma - \frac{1}{2} \pi - 5] + \\ & + \alpha_3 \eta^2 - \frac{8}{3} \alpha_1^3 \left[ 1 + \frac{1}{4} \eta^4 - \frac{3 \cdot 2^{\frac{1}{2}} \cdot \pi^{\frac{1}{2}}}{10(\frac{1}{4}!)^3} \eta \right]. \tag{77} \end{aligned}$$

Hence, from (42), 
$$a_5 = -\frac{2^{\frac{1}{2}} \cdot \pi}{40(\frac{1}{4}!)^2} \alpha_1^3. \tag{78}$$

We now turn to the equation for  $f_4$ , which on substituting in (44) we find to be

$$\begin{aligned} f_4''' - \frac{1}{2} \eta^3 f_4'' + 4 \eta^2 f_4' - 7 \eta f_4 &= P_1 - 6(\alpha_2^2 + 2\alpha_1 \alpha_3) \eta^2 - 2\alpha_1^2 \alpha_2 \eta^5 - \\ & - \frac{32}{3} \alpha_1^4 \left\{ \sum_{m=2}^{\infty} \frac{(16m^2 - 20m + 3)(m - \frac{5}{2})! (-\frac{1}{4}!) \eta^{4m}}{m! (-\frac{5}{2})! (m - \frac{1}{4})! 8^m (2m - 1)} \right. \\ & \quad \left. - \frac{3 \cdot 2^{\frac{1}{2}} \cdot \pi^{\frac{1}{2}}}{10(\frac{1}{4}!)^3} \sum_{m=1}^{\infty} \frac{(16m^2 - 12m - 1)(m - \frac{9}{4})! \frac{1}{4}! \eta^{4m+1}}{m! (-\frac{9}{4})! (m + \frac{1}{4})! 8^m (4m - 1)} \right\}. \tag{79} \end{aligned}$$

The general solution of (79) with a double zero at the origin is (with  $\alpha_4$  denoting a constant)

$$\begin{aligned} f_4 = \alpha_4 \eta^2 + \frac{P_1}{6} \left( \eta^3 - \frac{\eta^7}{105} \right) &+ 2(\alpha_2^2 + 2\alpha_1 \alpha_3) (\eta - g_4) - \frac{16}{7} \alpha_1^2 \alpha_2 \left( 1 + \frac{7\eta^4}{24} - h_4 \right) - \\ & - \frac{32}{3} \alpha_1^4 \left( L + \frac{3 \cdot 2^{\frac{1}{2}} \cdot \pi^{\frac{1}{2}}}{28 \cdot (\frac{1}{4}!)^3} \left( 1 + \frac{7\eta^4}{24} - h_4 \right) \right), \tag{80} \end{aligned}$$

where

$$L = \sum_{m=2}^{\infty} \frac{(m-\frac{1}{2})! \cdot (-\frac{1}{4})! (2m-3)\eta^{4m+3}}{m! (-\frac{5}{2})!(m-\frac{1}{4})! 8^m(4m+2)(4m+3)} - \frac{3 \cdot 2^{\frac{1}{2}} \cdot \pi^{\frac{1}{2}}}{40(\frac{1}{4}!)^3} \sum_{m=1}^{\infty} \frac{(m-\frac{9}{4})! \frac{1}{4}! (4m-5)\eta^{4m+4}}{m! (-\frac{9}{4})! (m+\frac{1}{4})! 8^m(4m+3)(4m+4)}. \tag{81}$$

Now

$$\frac{d^2 L}{d\eta^2} = \eta^8 \frac{d}{d\eta} \left\{ \frac{1}{2\eta^6} [{}_1F_1(-\frac{3}{2}, \frac{3}{4}, \eta^4/8) - 1 + \frac{1}{4}\eta^4] - \frac{3 \cdot 2^{\frac{1}{2}} \cdot \pi^{\frac{1}{2}}}{40(\frac{1}{4}!)^3} \frac{1}{\eta^5} [{}_1F_1(-\frac{5}{4}, \frac{5}{4}, \eta^4/8) - 1] \right\}, \tag{82}$$

and since, from (61) and (70)

$$\frac{1}{2\eta^6} {}_1F_1(-\frac{3}{2}, \frac{3}{4}, \eta^4/8) - \frac{3 \cdot 2^{\frac{1}{2}} \cdot \pi^{\frac{1}{2}}}{40(\frac{1}{4}!)^3} \frac{1}{\eta^5} {}_1F_1(-\frac{5}{4}, \frac{5}{4}, \eta^4/8) \sim \frac{3\pi}{32(\frac{1}{4}!)^2} \left\{ \frac{1}{15} - \frac{1}{\eta^4} + \frac{1}{2! \eta^8} - \frac{3}{3! \eta^{12}} + \frac{3 \cdot 7 \cdot 1 \cdot 3}{4! \eta^{16}} - \frac{3 \cdot 7 \cdot 11 \cdot 1 \cdot 3 \cdot 5}{5! \eta^{20}} + \dots \right\}, \tag{83}$$

the asymptotic expansion of  $L$  may be deduced apart from an additive constant and an additive multiple of  $\eta$ . The resulting expression may be checked, and the constant and the multiple of  $\eta$  determined, by considering

$$\frac{1}{2\pi i} \int (-s-1)! (-s-\frac{5}{4})! (s-\frac{9}{4})! \frac{(4s-5)\eta^{4s+4}}{8^s(4s+3)(4s+4)} ds \tag{84}$$

taken round a contour consisting of the straight line from  $-N-\frac{1}{2}-\infty i$  to  $-N-\frac{1}{2}+\infty i$  and the part of a circle of infinite radius to the right of the line. After some calculation it is found that†

$$L \sim -\frac{\eta^7}{168} - \frac{2^{\frac{1}{2}} \cdot \pi^{\frac{1}{2}}}{32(\frac{1}{4}!)^3} \eta^4 + \frac{\eta^3}{2} - \frac{3\pi}{32(\frac{1}{4}!)^2} \eta \{4 \log \eta + 2 \log 2 + \gamma - \frac{1}{2}\pi - 3\} - \frac{3 \cdot 2^{\frac{1}{2}} \cdot \pi^{\frac{1}{2}}}{20(\frac{1}{4}!)^3} + \frac{3\pi}{32(\frac{1}{4}!)^2} \left\{ \frac{\eta^5}{5} + \frac{1}{1 \cdot 2!} \frac{1}{\eta^3} - \frac{1 \cdot 3 \cdot 3}{2 \cdot 3!} \frac{1}{\eta^7} + \frac{1 \cdot 3 \cdot 5 \cdot 3 \cdot 7}{3 \cdot 4!} \frac{1}{\eta^{11}} - \dots \right\}. \tag{85}$$

As before  $\gamma$  denotes Euler's constant, and use has been made of (70), of the first equation of (68) with  $m = 1$ , and of the formulae

$$\mathfrak{F}(-\frac{1}{4}) = \frac{1}{2}\pi - 3 \log 2 - \gamma, \quad \mathfrak{F}(-\frac{1}{2}) = -2 \log 2 - \gamma. \tag{86}$$

The asymptotic expansions of all the terms in the expression for  $f_4$  in (80) are now known. In order that exponentially large terms should be absent from the asymptotic expansion of  $f_4$ ,  $g_4$  and  $h_4$  must occur in (80) in the same combination as in (72). The terms containing  $g_4$  and  $h_4$  in (80) are

$$-2(\alpha_2^2 + 2\alpha_1 \alpha_3)g_4 + \left( \frac{1^3}{7} \alpha_1^2 \alpha_2 + \frac{8 \cdot 2^{\frac{1}{2}} \cdot \pi^{\frac{1}{2}}}{7(\frac{1}{4}!)^3} \alpha_1^4 \right) h_4. \tag{87}$$

† I am indebted to Mr. C. W. Jones for the correction of three errors in (85) as first written.

Compare with (72), and use the value of  $\alpha_2$  from (75). We must have

$$2(\alpha_2^2 + 2\alpha_1\alpha_3) = \frac{7\pi^3}{20(\frac{1}{4}!)^6} \alpha_1^4 \quad (88)$$

and 
$$\alpha_3 = \frac{\pi^3}{400(\frac{1}{4}!)^6} (35 - 8 \cdot 2^{\frac{1}{2}}) \alpha_1^3. \quad (89)$$

Substituting for the coefficients of  $g_4$  and  $h_4$  in (80) from (88) and (75), we find that

$$f_4 = \alpha_4 \eta^2 + \frac{P_1}{6} \left( \eta^3 - \frac{\eta^7}{105} \right) - \frac{32}{3} \alpha_1^4 L + \frac{8 \cdot 2^{\frac{1}{2}} \cdot \pi^{\frac{1}{2}}}{5(\frac{1}{4}!)^3} \alpha_1^4 \left( \left( h_4 - 1 - \frac{7\eta^4}{24} \right) - \frac{7 \cdot 2^{\frac{1}{2}} \cdot \pi^{\frac{1}{2}}}{64 \cdot (\frac{1}{4}!)^3} (g_4 - \eta) \right). \quad (90)$$

The series expansions of  $L$ ,  $g_4$ , and  $h_4$  are given by (81), (52), and (53), so that the series expansion of  $f_4$  is easily written down. Its asymptotic expansion is found from (72) and (85) to be

$$f_4 \sim \left( \frac{4\alpha_1^4}{63} - \frac{P_1}{630} \right) \eta^7 - \frac{2^{\frac{1}{2}} \cdot \pi^{\frac{1}{2}}}{15(\frac{1}{4}!)^3} \alpha_1^4 \eta^4 + \left( \frac{P_1}{6} - \frac{16\alpha_1^4}{3} \right) \eta^3 + \left( \alpha_4 - \frac{21 \cdot 2^{\frac{1}{2}} \cdot \pi^{\frac{1}{2}}}{400(\frac{1}{4}!)^7} \alpha_1^4 \right) \eta^2 + \frac{4\pi}{(\frac{1}{4}!)^2} \alpha_1^4 \eta \log \eta + \frac{\pi}{(\frac{1}{4}!)^2} \alpha_1^4 \eta \left[ 2 \log 2 + \gamma - \frac{1}{2}\pi - 3 + \frac{7\pi^2}{20(\frac{1}{4}!)^4} \right] - \frac{\pi^2}{30(\frac{1}{4}!)^4} \alpha_1^4 \left\{ \frac{\eta^7}{5} - \frac{3 \cdot 7}{1!} \eta^3 - \frac{3 \cdot 1 \cdot 7 \cdot 3}{1!} \frac{1}{\eta} + \frac{3 \cdot 1 \cdot 1 \cdot 7 \cdot 3 \cdot 1}{7 \cdot 3!} \frac{1}{\eta^5} - \frac{3 \cdot 1 \cdot 1 \cdot 3 \cdot 7 \cdot 3 \cdot 1 \cdot 5}{11 \cdot 4!} \frac{1}{\eta^9} + \dots \right\} - \frac{\pi}{(\frac{1}{4}!)^2} \alpha_1^4 \left\{ \frac{\eta^5}{5} + \frac{1}{1 \cdot 2!} \frac{1}{\eta^3} - \frac{1 \cdot 3 \cdot 3}{2 \cdot 3!} \frac{1}{\eta^7} + \frac{1 \cdot 3 \cdot 5 \cdot 3 \cdot 7}{3 \cdot 4!} \frac{1}{\eta^{11}} - \dots \right\}. \quad (91)$$

It follows from (42) that

$$a_6 = \alpha_1^4 \left[ \frac{1}{9} - \frac{7\pi^2}{600(\frac{1}{4}!)^4} \right] - \frac{P_1}{360}. \quad (92)$$

The analytical discussion of  $f_4$  is now complete. The equations for  $f_6$ ,  $f_8$ , etc., have not been completely solved, but some discussion of these equations will now be given.

In addition to the complementary function  $\alpha_r \eta^2$ , the equation for  $f_r$  has one complementary function whose asymptotic expansion for large positive values of  $\eta$  commences with a multiple of  $\eta^{-(r+10)} \exp(\eta^4/8)$ , and another complementary function whose asymptotic expansion commences with a



multiple of  $\eta^{r+3}$  followed by a multiple of  $\eta^{r-1}$ . For the solution to be successful, exponentially large terms must not occur in the asymptotic expansion of  $f_r$ , which must begin with a multiple of  $\eta^{r+3}$ . For  $r \leq 4$  this condition is satisfied, and, moreover, the next term in the asymptotic expansion is a multiple of  $\eta^{r+1}$ . Assume for the moment that these statements are correct for  $r \leq n-1$ . Consider the asymptotic expansion of  $G_n$ , the left-hand side of the equation for  $f_n$  in (44). The terms of highest degree occurring could be multiples of  $\eta^{n+4}$ , but it is not difficult to prove that the terms in  $\eta^{n+4}$  always cancel, and that in fact the asymptotic expansion of  $G_n$  begins with a multiple of  $\eta^{n+2}$ . It follows that the equation for  $f_n$  has a particular integral, which we denote by  $I$ , whose asymptotic expansion begins with a multiple of  $\eta^{n+1}$ . Any particular integral may be expressed as the sum of  $I$  and multiples of the complementary functions. The particular integral with a double zero at the origin is indeterminate only to the extent of an additive multiple of  $\eta^2$ , and what is required is that it should not involve the complementary function that is exponentially large at infinity. If the presence of the exponentially large complementary function can be avoided, the asymptotic expansion of the solution with a double zero at the origin will begin with a multiple of  $\eta^{n+3}$  (from the other complementary function), followed by a multiple of  $\eta^{n+1}$  (from  $I$ ). Hence by induction it will be true generally that the asymptotic expansion of  $f_r$  will begin with a multiple of  $\eta^{r+3}$ , followed by a multiple of  $\eta^{r+1}$ .

Now  $f_{n-1}$  contains a term  $\alpha_{n-1} \eta^2$ , where  $\alpha_{n-1}$  is a constant which is undetermined at that stage of the solution at which we solve for  $f_{n-1}$ . The only terms in  $G_n$  containing  $\alpha_{n-1}$  arise from the terms in the expression for  $G_n$  which contain  $f_{n-1}$  or its derivatives, and it is easy to see that the sum of the terms in  $G_n$  containing  $\alpha_{n-1}$  is  $-(2n+4)\alpha_1 \alpha_{n-1} \eta^2$ . The corresponding term in the solution for  $f_n$  with a double zero at the origin is  $4\alpha_1 \alpha_{n-1} (\eta - g_n)$ . Unless  $n = 4m+2$ , where  $m$  is a positive integer or zero, the asymptotic expansion of  $g_n$  involves exponentially large terms. Other exponentially large terms occurring in the solution for  $f_n$  can arise only from multiples of  $g_n$  or (when  $n \neq 4m+1$ ) from multiples of  $h_n$ . Since a suitable combination of  $h_n$  and  $g_n$  has an asymptotic expansion devoid of exponentially large terms, and this combination involves  $h_n$  unless  $n = 4m+2$ , it follows that when  $n \neq 4m+2$  the presence of exponentially large terms in the solution for  $f_n$  can always be avoided by a suitable choice of  $\alpha_{n-1}$ . In this way, when  $n \neq 4m+2$ ,  $\alpha_{n-1}$  is determined.

On the other hand, when  $n = 4m+2$  the series for  $g_n$  in (52) terminates, the term of highest degree in  $g_n$  being a multiple of  $\eta^{n+3}$ . In such cases it is not possible to arrange for the absence of exponentially

large terms in  $f_n$  by a suitable choice of  $\alpha_{n-1}$ , and some other condition must be satisfied.

At each stage, in solving for  $f_n$ , the value of  $a_{n+2}$  is fixed by (42) in terms of such of the  $P_r$  as have occurred in the equations up to and including the equation for  $f_n$  and of such of the  $\alpha_r$ , for  $r \leq n-1$ , as have not been determined by the conditions for the absence of exponentially large terms.

In order to proceed farther, we consider in some detail the equations for  $f_5$  and  $f_6$ . The equation for  $f_5$  may be written

$$f_5''' - \frac{1}{2}\eta^3 f_5'' + \frac{3}{2}\eta^2 f_5' - 8\eta f_5 = -14\alpha_1 \alpha_4 \eta^2 - \frac{2}{3}\alpha_1 P_1 \left( \eta^3 + \frac{\eta^7}{30} \right) + \alpha_1^5 H_5(\eta), \tag{93}$$

where  $H_5(\eta)$  is a function of  $\eta$  independent of  $\alpha_1, \alpha_4$ , and  $P_1$ , and the solution with a double zero at the origin is

$$f_5 = \alpha_5 \eta^2 + 4\alpha_1 \alpha_4 (\eta - g_5) - \frac{\alpha_1 P_1}{45} \eta^6 + \alpha_1^5 k_5(\eta), \tag{94}$$

where  $k_5(\eta)$  is a function of  $\eta$  independent of  $\alpha_1, \alpha_4, \alpha_5$ , and  $P_1$ . The presence of exponentially large terms in the asymptotic expansion of  $f_5$  can be avoided by a suitable choice of  $\alpha_4$ , of the form

$$\alpha_4 = (\text{constant})\alpha_1^4. \tag{95}$$

The equation for  $f_6$  is then found to be of the form

$$f_6''' - \frac{1}{2}\eta^3 f_6'' + 5\eta^2 f_6' - 9\eta f_6 = -16\alpha_1 \alpha_5 \eta^2 - \frac{26}{45}\alpha_1^2 P_1 \eta^6 - \frac{8}{3}\alpha_2 P_1 \left( \eta^3 + \frac{\eta^7}{20} \right) + \alpha_1^6 H_6(\eta), \tag{96}$$

where  $H_6(\eta)$  is independent of  $\alpha_1, \alpha_4, \alpha_5$ , and  $P_1$ , and the solution with a double zero at the origin is

$$f_6 = \alpha_6 \eta^2 + 4\alpha_1 \alpha_5 (\eta - g_6) - \frac{13\alpha_1^2 P_1}{11340} \eta^9 - \frac{\alpha_2 P_1}{45} \eta^6 + \alpha_1^6 k_6(\eta), \tag{97}$$

where  $k_6(\eta)$  is independent of  $\alpha_1, \alpha_5, \alpha_6$ , and  $P_1$ . From (52)

$$g_6 = \eta + \frac{\eta^5}{15} - \frac{\eta^9}{1260}. \tag{98}$$

Hence

$$f_6 = \alpha_6 \eta^2 + \alpha_1 \alpha_5 \left( \frac{\eta^9}{315} - \frac{4\eta^5}{15} \right) - \frac{13\alpha_1^2 P_1}{11340} \eta^9 - \frac{\alpha_2 P_1}{45} \eta^6 + \alpha_1^6 k_6(\eta). \tag{99}$$

In order that the asymptotic expansion of  $f_6$  should contain no exponentially large terms it is necessary that the asymptotic expansion of  $k_6$  should contain no exponentially large terms, i.e. that the particular integral of

$$f_6''' - \frac{1}{2}\eta^3 f_6'' + 5\eta^2 f_6' - 9\eta f_6 = H_6(\eta) \tag{100}$$

with a double zero at the origin should contain no exponentially large

terms. This particular integral is indeterminate only to the extent of an additive multiple of  $\eta^2$ , and since the expansion of  $H_6$  in ascending powers of  $\eta$  begins with a multiple of  $\eta^2$ , we may consider the condition to refer to the particular integral of which the expansion in ascending powers of  $\eta$  begins with a multiple of  $\eta^5$ . The condition may be given a more definite form. Put

$$f_6 = \eta^2 y_6, \quad \text{and} \quad y'_6 = z_6. \tag{101}$$

Then (100) becomes

$$\eta^2 z'_6 + (6\eta - \frac{1}{2}\eta^5)z'_6 + (6 + 3\eta^4)z_6 = H_6(\eta). \tag{102}$$

A complementary function of (102) (corresponding with the complementary function  $g_6(\eta)$  of the equation for  $f_6$ ) is

$$u_6 = -\frac{1}{\eta^2} + \frac{\eta^2}{5} - \frac{\eta^6}{180}. \tag{103}$$

If we put 
$$z_6 = u_6 v_6 \quad \text{and} \quad v'_6 = w_6, \tag{104}$$

(102) becomes

$$\frac{d}{d\eta} [u_6^2 \eta^6 w_6 \exp(-\eta^4/8)] = H_6 u_6 \eta^4 \exp(-\eta^4/8). \tag{105}$$

The expansion of the right-hand side of (105) in ascending powers of  $\eta$  begins with a multiple of  $\eta^4$ . As explained, the expansion of the required particular integral for  $f_6$  begins with a multiple of  $\eta^5$ , and hence the expansion of  $u_6^2 \eta^6 w_6 \exp(-\eta^4/8)$  begins with a multiple of  $\eta^5$ . The required solution of (105) is therefore

$$u_6^2 \eta^6 w_6 \exp(-\eta^4/8) = \int_0^\eta H_6 u_6 \eta^4 \exp(-\eta^4/8) d\eta. \tag{106}$$

If the asymptotic expansion of  $f_6$  contains no exponentially large terms, the asymptotic expansion of  $w_6$  contains no exponentially large terms, and the left-hand side of (106)  $\rightarrow 0$  when  $\eta \rightarrow \infty$ . Hence the required condition is

$$\int_0^\infty H_6 u_6 \eta^4 \exp(-\eta^4/8) d\eta = 0, \tag{107}$$

i.e. 
$$\int_0^\infty H_6 \left( \eta^2 - \frac{\eta^6}{5} + \frac{\eta^{10}}{180} \right) \exp(-\eta^4/8) d\eta = 0. \tag{108}$$

The expression for  $H_6$  is easily found from the expression for  $G_6$  in (46), but I have not been able to evaluate analytically the integral on the right of (108). The matter has been further considered by Mr. C. W. Jones, who finds numerically that the integral condition is satisfied to the accuracy of his computations.

If we assume for the present that the condition (108) is satisfied, we may proceed to consider the equations for  $f_7, f_8$ , etc., in the same way as

we considered the equations for  $f_5$  and  $f_6$ . From the condition for the absence of exponentially large terms in the asymptotic expansion of  $f_7$ ,  $\alpha_6$  is determined in terms of  $\alpha_1$ ,  $\alpha_5$ , and  $P_1$ . Similarly  $\alpha_7$  is determined from the equation for  $f_8$  in terms of  $\alpha_1$ ,  $\alpha_5$ , and  $P_1$ ,† and so on until we come to the equation for  $f_{10}$ . In the right-hand side,  $G_{10}$ , of the equation for  $f_{10}$ ,  $\alpha_9$  occurs only in the term  $-24\alpha_1\alpha_9\eta^2$ , and the corresponding part of the particular integral with a double zero at the origin is  $4\alpha_1\alpha_9(\eta-g_{10})$ . Since the series for  $g_{10}$  terminates, the term of highest degree being a multiple of  $\eta^{13}$ , this part of the particular integral contains no exponentially large terms, and  $\alpha_9$  will not be determined from the condition that the asymptotic expansion of  $f_{10}$  should contain no exponentially large terms.  $G_{10}$  also contains a multiple of  $\alpha_5^2\eta^2$  and certain very complicated terms linear in  $\alpha_5$ , in particular a term in  $\alpha_1^5\alpha_5$ . (It further contains in particular complicated terms that are multiples of  $\alpha_1^{10}$  and  $\alpha_1^6P_1$ .) The part of the particular integral that corresponds with the multiple of  $\alpha_5^2\eta^2$  in  $G_{10}$  will be a multiple of  $\alpha_5^2(\eta-g_{10})$ , and will not be exponentially large at infinity. Unless, therefore, the part of the particular integral corresponding with those complicated terms in  $G_{10}$  which are linear in  $\alpha_5$  also fails to become exponentially large at infinity,  $\alpha_5$  will be determined from the condition that  $f_{10}$  as a whole should not be exponentially large, which condition it will thus always be possible to fulfil. In other words, it seems probable (though I have not proved it) that  $\alpha_5$  is determined from the equation for  $f_{10}$ ,  $\alpha_9$  from the equation for  $f_{14}$ , and so on. If this is correct, then only  $\alpha_1$  remains undetermined among the  $\alpha$ 's, and therefore only  $a_4$  among the  $a$ 's. As explained in the introduction,  $a_4$  is then probably determined by the condition  $u_1 \rightarrow 1$  as  $y_1 \rightarrow \infty$  at  $x_1 = 0$ , in which case the whole solution is determined at separation, and probably what we have considered is an asymptotic solution at and near separation, applying (in the non-dimensional form here considered) to all cases in which the  $P$ 's are the same.

### 3. The solution upstream for large values of $y_1/x_1^\dagger$

Our first aim in this section is to exhibit the *form* of the solution for large values of  $y_1/x_1^\dagger$ . By carrying through the suggested calculation in some detail we also provide a check on part of the work in the preceding section.

† The right-hand side,  $G_8$ , of the equation for  $f_8$  contains  $P_2$  and a term,  $-\frac{P_1^2}{3}\left(\eta^4 + \frac{\eta^8}{15}\right)$ , in  $P_1^2$ . The corresponding parts of the particular integral with a double zero at the origin are, however,

$$P_2\left(\frac{\eta^3}{6} - \frac{\eta^7}{315} + \frac{\eta^{11}}{31185}\right) \quad \text{and} \quad -P_1^2\left(\frac{\eta^7}{630} + \frac{\eta^{11}}{155925}\right)$$

and contain no exponentially large terms, so that the expression for  $\alpha_7$  will involve neither  $P_2$  nor  $P_1^2$ .

According to the solution in the preceding section,  $\psi_1$  is found in the form of the series (24), where

$$f_0 = \frac{\eta^3}{6}, \quad f_1 = \alpha_1 \eta^2, \quad f_2 = \alpha_2 \eta^2 - \frac{\alpha_1^2}{15} \eta^5, \tag{109}$$

$\alpha_2$  is given by (75), and for large positive values of  $\eta$

$$f_3 \sim A_3 \eta^6 + C_3 \eta^4 + E'_3 \eta^2 \log \eta + E_3 \eta^2 + F_3 \eta + G_3 + K_3 \eta^{-2} + \dots, \tag{110}$$

where

$$\left. \begin{aligned} A_3 &= -\frac{\pi}{60(\frac{1}{4}!)^2} \alpha_1^3, & C_3 &= -\frac{2}{3} \alpha_1^3, & E'_3 &= \frac{\pi}{(\frac{1}{4}!)^2} \alpha_1^3, \\ E_3 &= \frac{\pi}{4(\frac{1}{4}!)^2} \alpha_1^3 \left[ 2 \log 2 + \gamma - \frac{1}{2} \pi - 5 + \frac{\pi^2}{100(\frac{1}{4}!)^4} (35 - 8 \cdot 2^{\frac{1}{2}}) \right], \\ F_3 &= \frac{4 \cdot 2^{\frac{1}{2}} \cdot \pi^{\frac{1}{2}}}{5(\frac{1}{4}!)^3} \alpha_1^3, & G_3 &= -\frac{8}{3} \alpha_1^3, & K_3 &= \frac{\pi}{8(\frac{1}{4}!)^2} \alpha_1^3, \end{aligned} \right\} \tag{111}$$

and

$$f_4 \sim A_4 \eta^7 + C_4 \eta^5 + D_4 \eta^4 + E_4 \eta^3 + F_4 \eta^2 + G'_4 \eta \log \eta + G_4 \eta + K_4 \eta^{-1} + \dots, \tag{112}$$

where

$$\left. \begin{aligned} A_4 &= \left[ \frac{4}{63} - \frac{\pi^2}{150(\frac{1}{4}!)^4} \right] \alpha_1^4 - \frac{P_1}{630}, & C_4 &= -\frac{\pi}{5(\frac{1}{4}!)^2} \alpha_1^4, \\ D_4 &= -\frac{2^{\frac{1}{2}} \cdot \pi^{\frac{1}{2}}}{15(\frac{1}{4}!)^3} \alpha_1^4, & E_4 &= \frac{P_1}{6} - \left[ \frac{16}{3} - \frac{7\pi^2}{10(\frac{1}{4}!)^4} \right] \alpha_1^4, \\ F_4 &= \alpha_4 - \frac{21 \cdot 2^{\frac{1}{2}} \cdot \pi^{\frac{1}{2}}}{400(\frac{1}{4}!)^7} \alpha_1^4 \quad (\alpha_4 \text{ has not been calculated}), \\ G'_4 &= \frac{4\pi}{(\frac{1}{4}!)^2} \alpha_1^4, & G_4 &= \frac{\pi}{(\frac{1}{4}!)^2} \alpha_1^4 \left[ 2 \log 2 + \gamma - \frac{1}{2} \pi - 3 + \frac{7\pi^2}{20(\frac{1}{4}!)^4} \right], \\ K_4 &= \frac{7\pi^2}{20(\frac{1}{4}!)^4} \alpha_1^4. \end{aligned} \right\} \tag{113}$$

Now substitute the expressions for  $f_0, f_1, f_2$  and the asymptotic formulae for  $f_3$  and  $f_4$  into the series (24) for  $\psi_1$ , substitute for  $\eta$  from  $2^{\frac{1}{2}} \xi \eta = y_1$ , and rearrange in powers of  $\xi$  and  $\log \xi$ . The work is purely formal, and no justification is attempted. The result, which can hold only for large values of  $y_1/x_1^{\frac{1}{2}}$ , is

$$\begin{aligned} \psi_1 &= \frac{y_1^3}{6} - \frac{\alpha_1^2}{30} y_1^5 + \frac{A_3}{2^{\frac{1}{2}}} y_1^6 + \frac{A_4}{4} y_1^7 + \dots \\ &\quad + \xi^2 (2^{\frac{1}{2}} \alpha_1 y_1^2 + 2^{-\frac{1}{2}} C_3 y_1^4 + \frac{1}{2} C_4 y_1^5 + \dots) + \\ &\quad + \xi^3 (2^{\frac{1}{2}} \alpha_2 y_1^2 + 2^{-\frac{1}{2}} D_4 y_1^4 + \dots) + \\ &\quad + \xi^4 \{ [2^{\frac{1}{2}} E_3 - 2^{-\frac{1}{2}} E'_3 \log 2] y_1^2 + 2^{\frac{1}{2}} E'_3 y_1^2 \log y_1 + E_4 y_1^3 + \dots \} + \\ &\quad + \xi^4 \log \xi (-2^{\frac{1}{2}} E'_3 y_1^2 + \dots) + \\ &\quad + \xi^5 (2F_3 y_1 + 2^{\frac{1}{2}} F_4 y_1^2 + \dots) + \dots \end{aligned} \tag{114}$$

We are therefore led to assume, as a form valid for sufficiently large values of  $y_1/x_1^{\frac{1}{2}}$ ,

$$\psi_1 = \chi_0(y_1) + \xi^2 \chi_2(y_1) + \xi^3 \chi_3(y_1) + \xi^4 \chi_4(y_1) + (\xi^4 \log \xi) \bar{\chi}_4(y_1) + \xi^5 \chi_5(y_1) + \dots, \quad (115)$$

and the initial terms of the expansions of the  $\chi$  in powers of  $y_1$  are found by comparing with (114). In fact, since the form (115) is not valid unless  $y_1/x_1^{\frac{1}{2}}$  is sufficiently large, the boundary conditions at  $y_1 = 0$  cannot be applied, and the solution found must be joined to the solution in the preceding section by using the first few terms of the expansions of the  $\chi$ 's as given by (114). On the other hand, the solution in this section should satisfy the condition  $u_1 \rightarrow U_1$  as  $y_1 \rightarrow \infty$ .

From (115)

$$u_1 = \frac{\partial \psi_1}{\partial y_1} = \chi'_0 + \xi^2 \chi'_2 + \xi^3 \chi'_3 + \xi^4 \chi'_4 + (\xi^4 \log \xi) \bar{\chi}'_4 + \xi^5 \chi'_5 + \dots, \quad (116)$$

$$v_1 = \frac{\partial \psi_1}{\partial x_1} = \frac{1}{4\xi^2} \{2\chi_2 + 3\xi \chi_3 + \xi^2(4\chi_4 + \bar{\chi}_4) + 4(\xi^2 \log \xi) \bar{\chi}_4 + 5\xi^3 \chi_5 + \dots\}. \quad (117)$$

We substitute in the reduced equation of motion (16) (with  $\partial p_1/\partial x_1$  as in (17)), multiply by  $4\xi^2$ , equate coefficients of  $\xi^0$ ,  $\xi$ ,  $\xi^2$ ,  $\xi^2 \log \xi$ , and  $\xi^3$ , and obtain the following equations:

$$\chi''_0 \chi_2 - \chi'_0 \chi'_2 = 0, \quad (118)$$

$$\chi''_0 \chi_3 - \chi'_0 \chi'_3 = 0, \quad (119)$$

$$\chi''_0(4\chi_4 + \bar{\chi}_4) - \chi'_0(4\chi'_4 + \bar{\chi}'_4) = 4 + 4\chi'''_0 + 2(\chi_2'^2 - \chi_2 \chi_2''), \quad (120)$$

$$\chi''_0 \bar{\chi}_4 - \chi'_0 \bar{\chi}'_4 = 0, \quad (121)$$

$$5(\chi''_0 \chi_5 - \chi'_0 \chi'_5) = 5\chi_2 \chi_3 - 3\chi_2'' \chi_3 - 2\chi_2 \chi_3'', \quad (122)$$

Now 
$$\chi'_0 = \frac{1}{2}y_1^2 - \frac{1}{8}\alpha_1^2 y_1^4 + \frac{3A_3}{2^{\frac{1}{2}}}y_1^5 + \frac{7A_4}{4}y_1^6 + \dots, \quad (123)$$

and is, of course, the value of  $u_1$  at  $\xi = 0$ , namely,

$$\frac{1}{2}y_1^2 + a_3 y_1^3 + a_4 y_1^4 + \dots,$$

as may be verified from the values of  $A_3$ ,  $A_4$ ,  $a_3$ ,  $a_4$ ,  $a_5$ ,  $a_6$ .

The solution of (118) is

$$\chi_2 = (\text{constant})\chi'_0. \quad (124)$$

The constant multiplier is determined by making the coefficient of  $y_1^2$  in the expansion of  $\chi_2$  equal to  $2^{\frac{1}{2}}\alpha_1$ . Hence

$$\chi_2 = 2^{\frac{1}{2}}\alpha_1 \chi'_0. \quad (125)$$

(It may now be verified that the coefficients of  $y_1^4$  and  $y_1^5$  in the expansion of  $\chi_2$  are the same as in (114), and the values of  $C_3$  and  $C_4$  are thus checked.)

Similarly from (119) and (121) it follows that  $\chi_3$  and  $\bar{\chi}_4$  are constant

multiples of  $\chi'_0$ , and the multipliers are determined from the coefficients of  $y_1^2$  by comparison with (114). In these multipliers the values of  $\alpha_2$  and  $E'_3$  are substituted from (75) and (111), and it is found that

$$\chi_3 = \frac{2^{\frac{1}{2}} \cdot \pi^{\frac{1}{2}}}{5(\frac{1}{4}!)^3} \alpha_1^2 \chi'_0, \tag{126}$$

$$\bar{\chi}_4 = -\frac{2^{\frac{1}{2}} \pi}{(\frac{1}{4}!)^2} \alpha_1^3 \chi'_0. \tag{127}$$

(The coefficient of  $y_1^4$  in the expansion of  $\chi_3$  may now be verified, and the value of  $D_4$  so checked.)

In (120) the terms in  $\bar{\chi}_4$  may be omitted, since they cancel by (121), and the value of  $\chi_2$  may be substituted from (125). The equation for  $\chi_4$  is thus seen to be

$$\frac{d}{dy_1} \left( \frac{\chi_4}{\chi'_0} \right) = \chi_0^{-2} \{ 1 - \chi_0''' - 4\alpha_1^2 (\chi_0''^2 - \chi'_0 \chi_0''') \}. \tag{128}$$

The expression on the right of (128) may be expanded in a series of ascending powers of  $y_1$ ; the first terms are

$$-\frac{120 \cdot 2^{\frac{1}{2}} \cdot A_3}{y_1} + (\frac{8}{3} \alpha_1^4 - 210 A_4) + \dots \tag{129}$$

Hence the solution of (128) is

$$\chi_4 = \chi'_0 \int_0^{y_1} \left\{ \frac{1 - \chi_0''' - 4\alpha_1^2 (\chi_0''^2 - \chi'_0 \chi_0''')}{\chi_0'^2} + \frac{120 \cdot 2^{\frac{1}{2}} \cdot A_3}{y_1} \right\} dy_1 - 120 \cdot 2^{\frac{1}{2}} \cdot A_3 \chi'_0 \log y_1 + (\text{constant}) \chi'_0. \tag{130}$$

The constant multiplier of  $\chi'_0$  is found from the coefficient of  $y_1^2$  to be equal to

$$2^{\frac{1}{2}} E_3 - 2^{\frac{1}{2}} E'_3 \log 2 = \frac{2^{\frac{1}{2}} \pi}{2(\frac{1}{4}!)^2} \alpha_1^3 \left\{ \gamma - \frac{1}{2} \pi - 5 + \frac{\pi^2}{100(\frac{1}{4}!)^4} (35 - 8 \cdot 2^{\frac{1}{2}}) \right\}. \tag{131}$$

(The coefficients of  $y_1^2 \log y_1$  and  $y_1^3$  may now be verified, and the values of  $E'_3$  and  $E_4$  so checked.)

When we substitute for  $\chi_2$  and  $\chi_3$  from (125) and (126), the equation (122) for  $\chi_5$  reduces to

$$\chi_0'' \chi_5 - \chi'_0 \chi'_5 = \frac{8 \cdot 2^{\frac{1}{2}} \cdot \pi^{\frac{1}{2}}}{5(\frac{1}{4}!)^3} \alpha_1^3 (\chi_0''^2 - \chi'_0 \chi_0''') \tag{132}$$

with the solution

$$\chi_5 = \frac{8 \cdot 2^{\frac{1}{2}} \cdot \pi^{\frac{1}{2}}}{5(\frac{1}{4}!)^3} \alpha_1^3 \chi_0'' + (\text{constant}) \chi'_0. \tag{133}$$

From the coefficient of  $y_1^2$  the constant multiplier is seen to be  $2^{\frac{1}{2}} F_4$ , but it cannot be fully determined from results already found, since the expression for  $F_4$  in (113) contains  $\alpha_4$ , which has not been calculated.

(The coefficient of  $y_1$  in the expansion of  $\chi_5$  is determined without a knowledge of the constant multiplier, and is easily seen to be  $2F_3$ , as in (114). The value of  $F_3$  is thus checked.)

It remains to consider the condition that the velocity should pass smoothly over into the velocity of the main stream. As explained, we must suppose that this condition is satisfied at  $x_1 = 0$ ; as far as our formulae go,  $u_1$  is given by (116), so if the condition is satisfied at  $x_1 = 0$ ,  $\chi'_0 \rightarrow 1$ , and the second and higher derivatives  $\rightarrow 0$ , as  $y_1 \rightarrow \infty$ . From (125), (126), (127), and (133) it follows at once that  $\chi'_2, \chi'_3, \chi'_4, \chi'_5$  and their derivatives all  $\rightarrow 0$  as  $y_1 \rightarrow \infty$ . As regards  $\chi_4$ , we suppose that, as  $y_1 \rightarrow \infty$ ,  $\chi''_0 \rightarrow 0$  more rapidly than  $y_1^{-1}$ ; it may then be proved that as  $y_1 \rightarrow \infty$ ,  $\chi_4$  is asymptotically equal to a multiple of  $y_1$ , plus a constant, plus terms which  $\rightarrow 0$ , so that  $\chi_4 \rightarrow \infty$  as  $y_1 \rightarrow \infty$ ; but  $\chi''_0 \chi_4 \rightarrow 0$ , and we may then show from (118) that  $\chi'_4 \rightarrow 1$  and the second and higher derivatives  $\rightarrow 0$ , as  $y_1 \rightarrow \infty$ . We thus check that, as far as (116) goes,  $u_1 \rightarrow U_1$  (since  $\xi^4 = x_1$  and  $U_1 = 1$ ,  $dU_1/dx_1 = 1$  at  $x_1 = 0$ ), while  $\partial u_1/\partial y_1$  and higher derivatives  $\rightarrow 0$ .

#### 4. Discussion of the solution upstream

The solution in the preceding section holds only for large values of  $\eta$ . The solution in § 2 applies for small or moderate values of  $\eta$ ; it is valid also for large values of  $\eta$  (the asymptotic expansions of  $f_3$  and  $f_4$  being used), but is then useful only for small values of  $y_1$ , since in such a case it is essentially equivalent to the solution in § 3 with the  $\chi$ 's expanded in series and with only a few terms in each expansion known. The results that can be obtained from § 2 when  $\eta$  is large may therefore be more advantageously obtained from § 3 after we have obtained the formulae for the coefficients  $a_n$  in the expansion, in powers of  $y_1$ , of the value of  $u_1$  at  $x_1 = 0$ . (It should also be remembered that the asymptotic formulae of § 2 were necessary for the completion of the solution in § 3.)

Thus the formulae in §§ 2 and 3 are useful in different regions. In particular, the form of § 2 will be useful for studying the values at  $y_1 = 0$ ,  $x_1 \neq 0$  of the derivatives of  $u_1$  with respect to  $y_1$ , etc., whereas the formulae of § 3 will be useful for studying the nature of the solution at  $x_1 = 0$ ,  $y_1 \neq 0$ . The formulae of § 2 show that  $\lim_{x_1 \rightarrow 0} (\partial^n u_1 / \partial y_1^n)_{y_1=0} \neq n! a_n$  for  $n = 5$  and 6. For any non-zero value of  $y_1$ , however,  $\partial^n u_1 / \partial y_1^n$  is continuous at  $x_1 = 0$ . On the other hand, the formulae of § 3 show that  $v_1$  (and  $\partial u_1 / \partial x_1$ ) are infinite at  $x_1 = 0$ .

Because of the singularity at  $x_1 = 0$  the usual assumptions of boundary-layer theory are invalid at  $x_1 = 0$  and in the immediate neighbourhood. Nevertheless, the mathematical result that  $v_1$  is infinite may be taken to indicate that large cross-velocities are to be expected at separation;



otherwise the assumptions of boundary-layer theory would not break down.

### 5. The solution downstream

In considering the motion downstream from separation we reduce the equations of motion and continuity to non-dimensional form by the same substitutions as before, except that in place of  $x_1$  we use

$$x'_1 = -x_1 = (x - x_s)/l, \tag{134}$$

so that  $x'_1$  is positive downstream. The governing equations are obtained by replacing  $x_1$  by  $-x'_1$  in (16) and (17), and in place of (23) and (24) we write

$$\xi' = x'^{\frac{1}{2}}, \quad \eta' = y_1/2^{\frac{1}{2}}x'^{\frac{1}{2}}, \tag{135}$$

$$\psi_1 = 2^{\frac{1}{2}}\xi'^3[F_0(\eta') + \xi'F_1(\eta') + \xi'^2F_2(\eta') + \dots]. \tag{136}$$

We obtain differential equations for the  $F$  in the same way as before; moreover, the boundary conditions are the same, for the conditions  $\psi_1 = 0$  and  $u_1 = 0$  at  $y_1 = 0$  lead to

$$F_r(0) = F'_r(0) = 0 \quad (r = 0, 1, 2, \dots) \tag{137}$$

and the condition that  $\lim_{\xi' \rightarrow \infty} u_1$  is given by (21) leads to

$$\lim_{\eta' \rightarrow \infty} \frac{F'_r}{\eta'^{r+2}} = 2^{1/2}a_{r+2} \quad (r = 0, 1, 2, \dots). \tag{138}$$

The equation for  $F_0$  is

$$F_0''' + 3F_0F_0'' - 2F_0'^2 = 1, \tag{139}$$

and, since  $a_2 = \frac{1}{2}$ , the solution is the same as for  $f_0$ , namely,

$$F_0 = \eta'^3/6. \tag{140}$$

The equation for  $F_1$  is

$$F_1''' + \frac{1}{2}\eta'^3F_1'' - \frac{5}{2}\eta'^2F_1' + 4\eta'F_1 = 0, \tag{141}$$

and, since  $a_3 = 0$ , the solution is

$$F_1 = \beta_1 \eta'^2, \tag{142}$$

where  $\beta_1$  is a constant. The equation for  $F_2$  now becomes

$$F_2''' + \frac{1}{2}\eta'^3F_2'' - 3\eta'^2F_2' + 5\eta'F_2 = 4\beta_1^2 \eta'^2, \tag{143}$$

and the general solution for  $F_2$  with a double zero at the origin is

$$F_2 = \beta_2 \eta'^2 + \frac{1}{15}\beta_1^2 \eta'^5, \tag{144}$$

where  $\beta_2$  is a constant. Hence, from (138),

$$a_4 = \frac{1}{6}\beta_1^2. \tag{145}$$

But, from (50),  $a_4$  is zero (in which case  $\alpha_1$  is zero) or negative. If  $a_4$

is negative, there is no real solution downstream of separation. Hence there is no real solution downstream of separation unless  $\alpha_4 = 0$ .

### 6. The special case $\alpha_4 = 0$ . The solution without singularities

If we return to §2, and consider the motion upstream of separation when  $\alpha_1 = 0$ , the equations for the  $f$  are easily integrated, and we may show that  $\alpha_2 = \alpha_4 = \alpha_5 = \alpha_6 = \alpha_8 = \alpha_9 = \text{etc.} = 0$ ; the whole solution is free from singularities and may be verified by expanding  $\psi_1$  in a double power series in  $x_1$  and  $y_1$ . Moreover, since the solution is free from singularities it will hold also downstream. It is not possible, however, by the methods used, to consider if there are pressure distributions for which  $u_1 \rightarrow 1$  as  $y_1 \rightarrow \infty$  at  $x_1 = 0$ .

The most interesting special case of this solution is that in which  $\alpha_3 = \alpha_7 = \dots = 0$ , when it reduces to one that is easily found independently, namely (with  $x'_1 = -x_1$ ),

$$\psi_1 = \frac{1}{2} \frac{\partial p_1}{\partial x'_1} \frac{y_1^3}{3} + \frac{1}{360} \frac{\partial^2 p_1}{\partial x'^2_1} \frac{y_1^7}{7} + \frac{5 \left( \frac{\partial p_1}{\partial x'_1} \right)^2 \frac{\partial^3 p_1}{\partial x'^3_1} - 2 \frac{\partial p_1}{\partial x'_1} \left( \frac{\partial^2 p_1}{\partial x'^2_1} \right)^2}{453600} \frac{y_1^{11}}{11} + \dots, \quad (146)$$

so the expansion of  $u_1$  in powers of  $y_1$  contains only multiples of  $y_1^{4m+2}$ . This is a solution in which  $(\partial u / \partial y)_{y=0} = 0$  for all  $x$ , but in order that it should be valid it is necessary that  $\partial p_1 / \partial x'_1$  should be chosen so that  $u_1 \rightarrow 1$  when  $y_1 \rightarrow \infty$  at  $x'_1 = 0$ . Included in this solution is that special case of the solution discovered by Falkner and Skan (4) for which  $(\partial u / \partial y)_{y=0} = 0$  at all values of  $x$ . In the case considered by Falkner and Skan the velocity distributions at different values of  $x$  are similar; if more general solutions of the type shown in (146) exist, the velocity distributions at different values of  $x$  will not be similar in the general case.

It is a fairly straightforward matter to check that the known solution for  $U = cx^m$ , when  $m$  has the appropriate value, agrees with (146) as far as that equation goes; but the value of  $m$  is determined from the condition  $u \rightarrow U$  as  $y \rightarrow \infty$  and cannot be found by the methods used here. Since the velocity distributions at different values of  $x$  are similar, the appropriate value of  $m$  may be found from the solutions of an ordinary differential equation, and has been so found by Hartree (5).† No such method is available in the general case. Meanwhile the formulae of Falkner and Skan, when  $(\partial u / \partial y)_{y=0} = 0$ , have been fitted as a very special case into the formulae of this section, so far as those formulae go.

† For negative values of  $m$  the solution of the equation with the conditions  $\psi = 0$ ,  $u = 0$  at  $y = 0$  and  $u/U \rightarrow 1$  as  $y \rightarrow \infty$  is not unique, but may be made unique by requiring that  $1 - u/U$  shall be positive and shall  $\rightarrow 0$  exponentially as  $y \rightarrow \infty$ .

## REFERENCES

1. S. GOLDSTEIN, *Proc. Camb. Phil. Soc.* **26** (1930), 1–18.
2. L. PRANDTL, *Z.A.M.M.* **18** (1938), 77–82.
3. L. HOWARTH, *Proc. Roy. Soc. A*, **164** (1938), 547–64.
4. V. M. FALKNER and Miss S. W. SEAN, *Aeronautical Research Committee, Reports and Memoranda*, No. 1314 (1930).
5. D. R. HARTREE, *Proc. Camb. Phil. Soc.* **33** (1937), 223–39.
6. E. W. BARNES, *Camb. Phil. Trans.* **20** (1908), 253.
